# Supplementary material for: Label-free nanoUPLC-MSE based quantification of antimicrobial peptides from the leaf apoplast of Nicotiana attenuata
Source: PubMed Central journal article supplement (PMC4318441; doi:10.1186/s12870-014-0398-9), 2015-01-21
Supplement: 12870_2014_398_MOESM1_ESM.pdf [file 12870_2014_398_MOESM1_ESM.pdf]

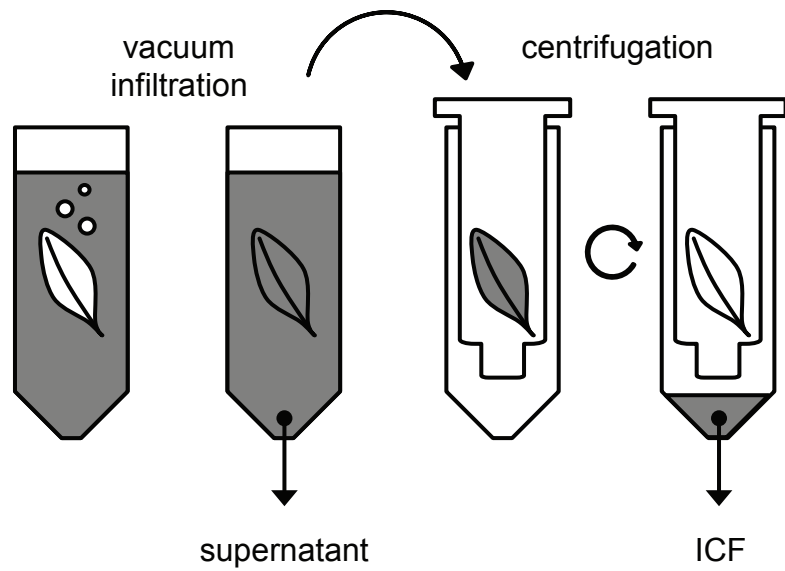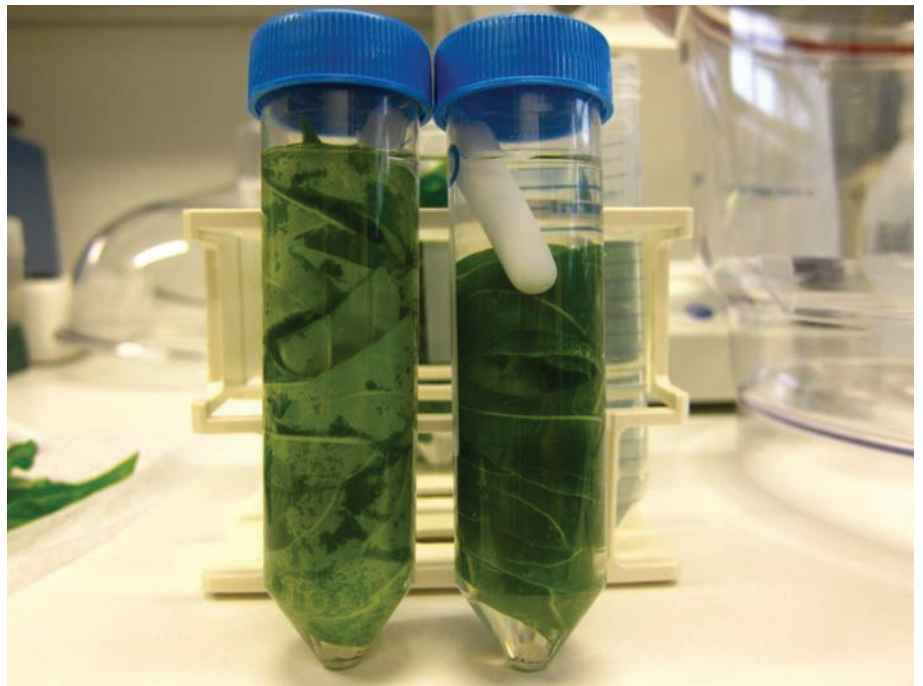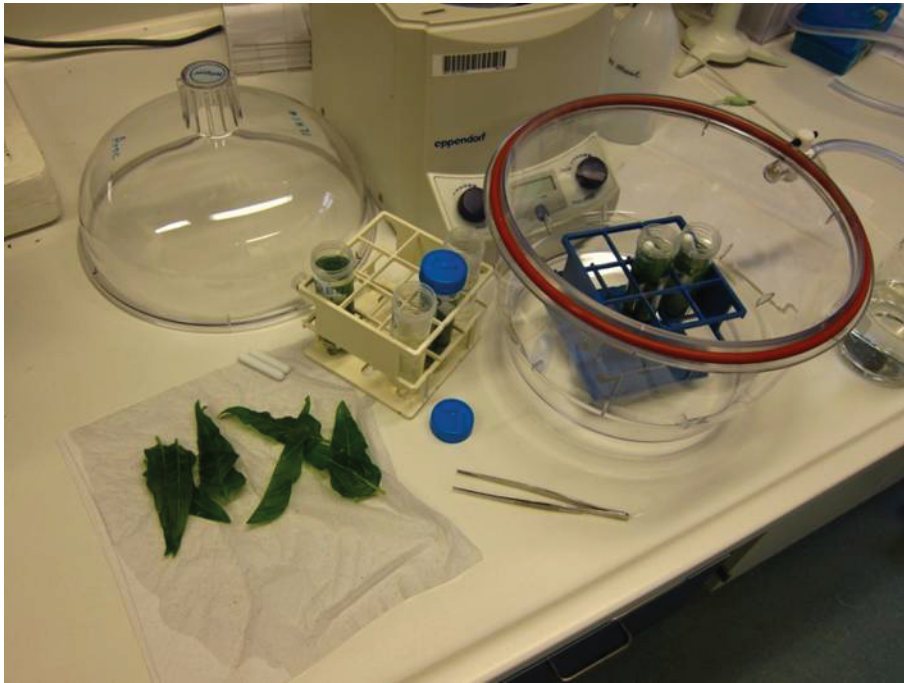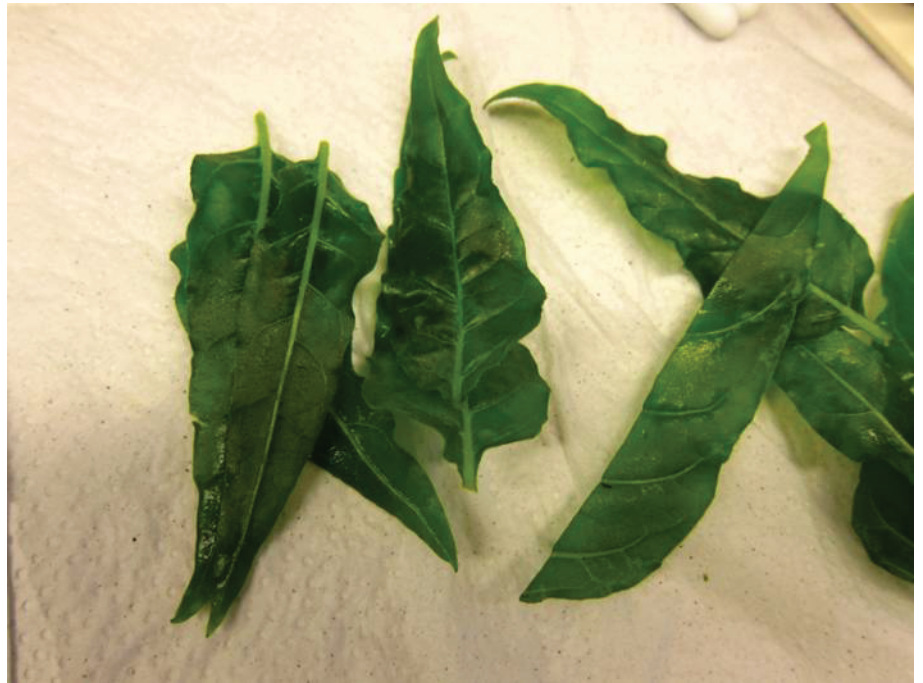

**Additional file 1: Illustration of the vacuum infiltration procedure.**

*N. attenuata* leaves were submerged in infiltration buffer and exposed to a vacuum inside a desiccator. A complete infiltration was indicated by the darkening of the leaves and a more translucent appearance. The remaining infiltration buffer was collected as “supernatant”. The infiltrated leaves were centrifuged and the extracted liquid was collected as intercellular fluid (ICF).
