# Supplementary material for: Label-free nanoUPLC-MSE based quantification of antimicrobial peptides from the leaf apoplast of Nicotiana attenuata
Source: PubMed Central journal article supplement (PMC4318441; doi:10.1186/s12870-014-0398-9), 2015-01-21
Supplement: 12870_2014_398_MOESM4_ESM.pdf [file 12870_2014_398_MOESM4_ESM.pdf]

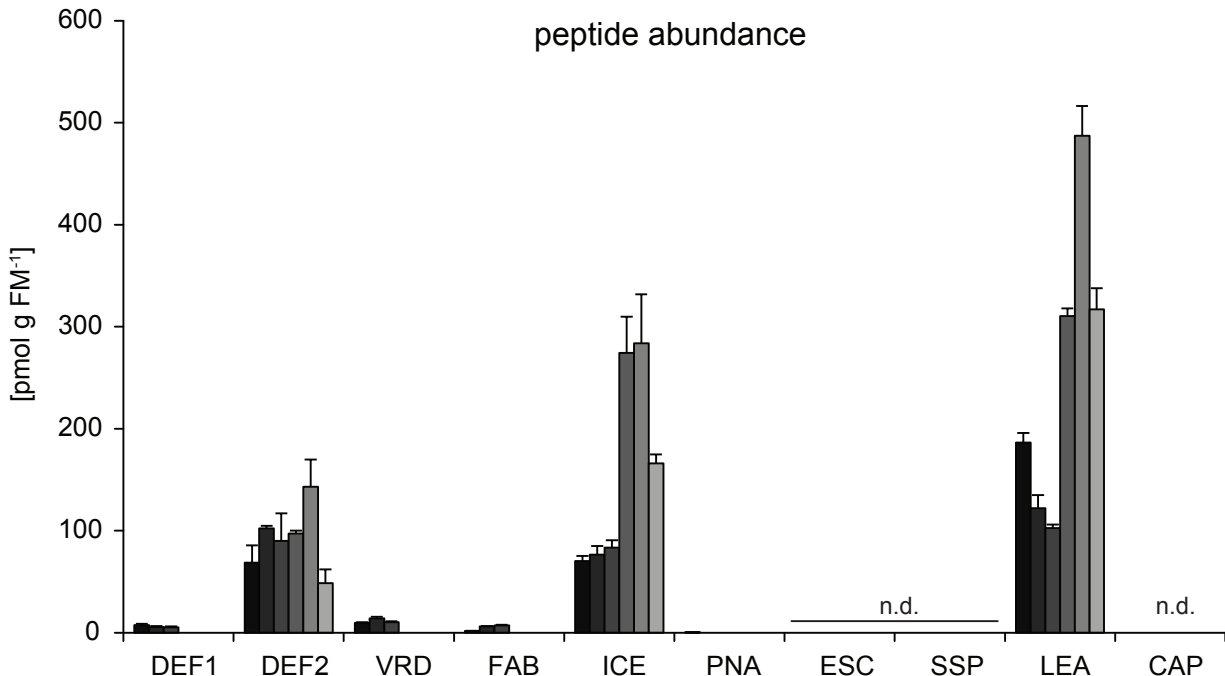

**Additional file 4: Biological and analytical variability of AMPs quantified using nanoUPLC-MS<sup>E</sup>.** The AMP abundance in 3 – 6 individual biological replicates is shown, each derived from the intercellular fluid extraction of a single *N. attenuata* plant. Error bars indicate the standard error of 3 – 5 technical replicates, n.d. = not detected.
