# Supplementary material for: Label-free nanoUPLC-MSE based quantification of antimicrobial peptides from the leaf apoplast of Nicotiana attenuata
Source: PubMed Central journal article supplement (PMC4318441; doi:10.1186/s12870-014-0398-9), 2015-01-21
Supplement: 12870_2014_398_MOESM6_ESM.pdf [file 12870_2014_398_MOESM6_ESM.pdf]

**A**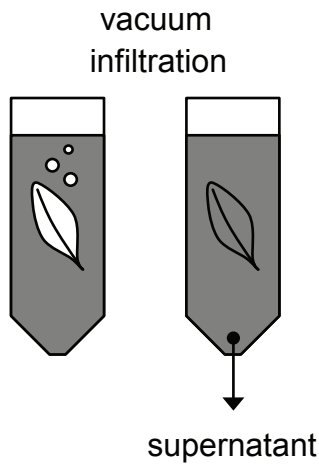**B**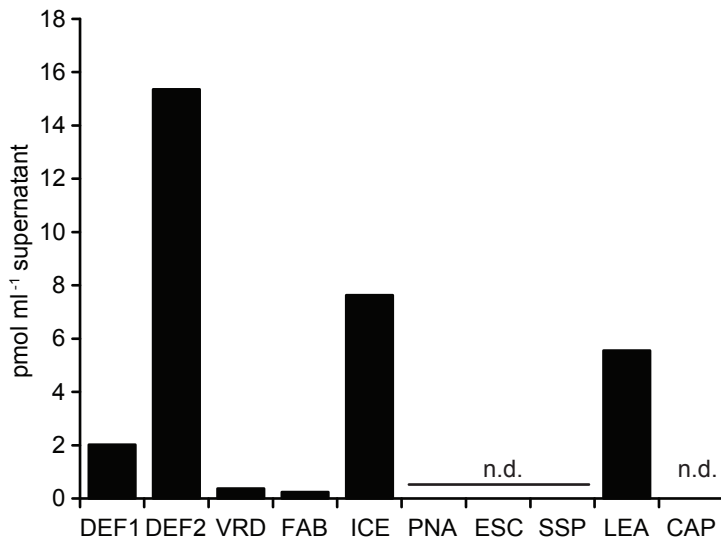**C**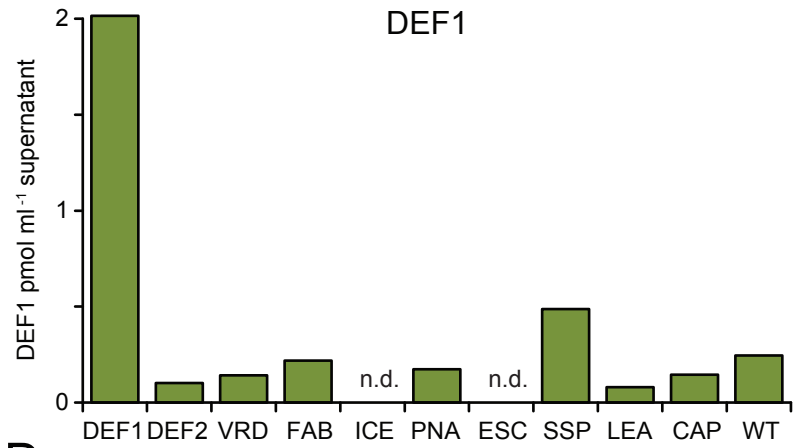**D**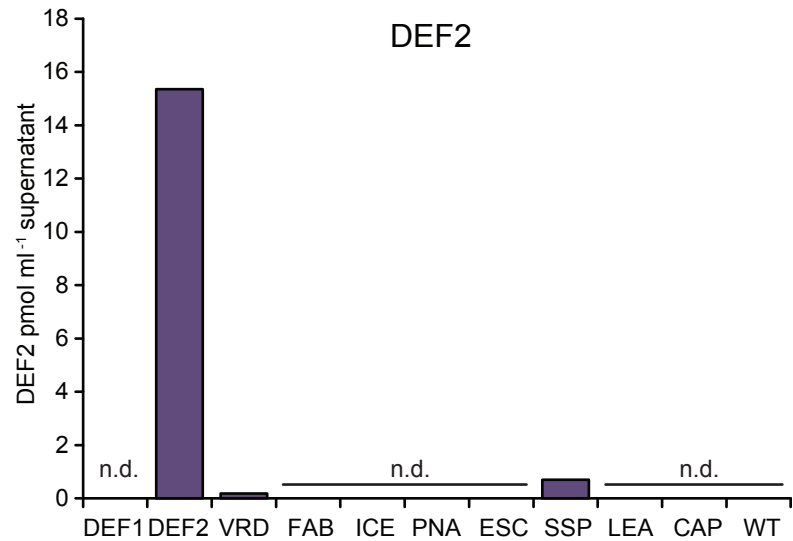

**Additional file 6: Determination of AMP abundance in the supernatant.**

(A) The supernatants after vacuum infiltration (MES, pH 5.5) were SPE desalted, spiked with BSA and analyzed using nanoUPLC-MS<sup>E</sup>, n.d. = not detected; (B) Comparison of all peptides from the supernatant of the respective genotype. (C) Comparison of DEF1 abundance in the supernatant. (D) Comparison of DEF2 abundance in the supernatant.
